# Supplementary material for: Benzothiadiazole-based polymer for single and double junction solar cells with high open circuit voltage
Source: Royal Society of Chemistry journal article supplement (doi:10.1039/c4nr01040j), 2014-01-01
Supplement: c4nr01040j1.pdf [file c4nr01040j1.pdf]

### Synthesis of PBT-T1

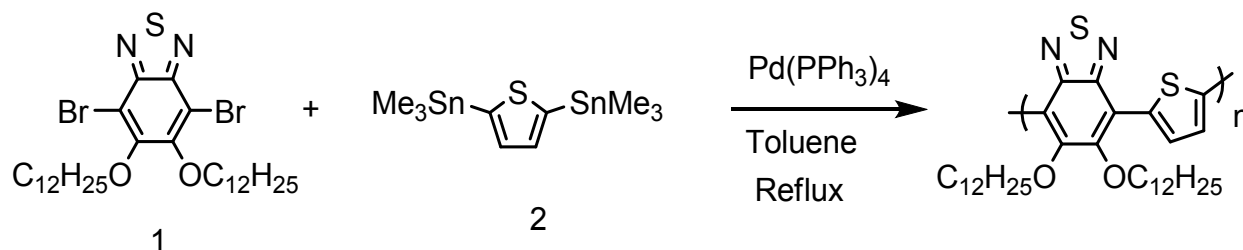

Figure 1 Synthesis procedure for PBT-T1

#### **Compound 1:**

4,7-Dibromo-5,6-bis(dodecyloxy)benzo[c][1,2,5]thiadiazole

#### **Compound 2:**

2,5-bis(trimethylstannyl)thiophene

#### **Materials**

All chemicals and reagents were used as received from commercial sources without purification. Solvents for chemical synthesis were purified by distillation. Chemical reactions were carried out under a nitrogen atmosphere. 4,7-Dibromo-5,6-bis(dodecyloxy)benzo[c][1,2,5]thiadiazole (1)<sup>1</sup>, 2,5-bis(trimethylstannyl)thiophene (2), 5,5'-bis(trimethylstannyl)-2,2'-bithiophene (3) and 2,5-bis(trimethylstannyl)thieno[3,2-b]thiophene (4) were prepared according to literature methods with fine adjustment.

#### **Procedure of Copolymer PBT-T1 Synthesis**

Compound (1) (0.331 g, 0.5 mmol) and compound (2) (0.205 g, 0.5 mmol) were dissolved in toluene (15 mL), and purged under a nitrogen atmosphere for 30 min. Subsequently, Pd(PPh<sub>3</sub>)<sub>4</sub> (20 mg) was added into the flask, and the reaction mixture was stirred and refluxed for 48 h. After being cooled to room temperature, the reaction mixture was poured into methanol. The collected solid was re-dissolved in chloroform and filtered to remove the metal catalyst. Then, the copolymer solution was concentrated and precipitated in a large amount of methanol. The solid was further purified by a Soxhlet extractor for 12 h in order with methanol, acetone as a solvent, and dried in a vacuum oven at 60 °C overnight. The yield was 67%.

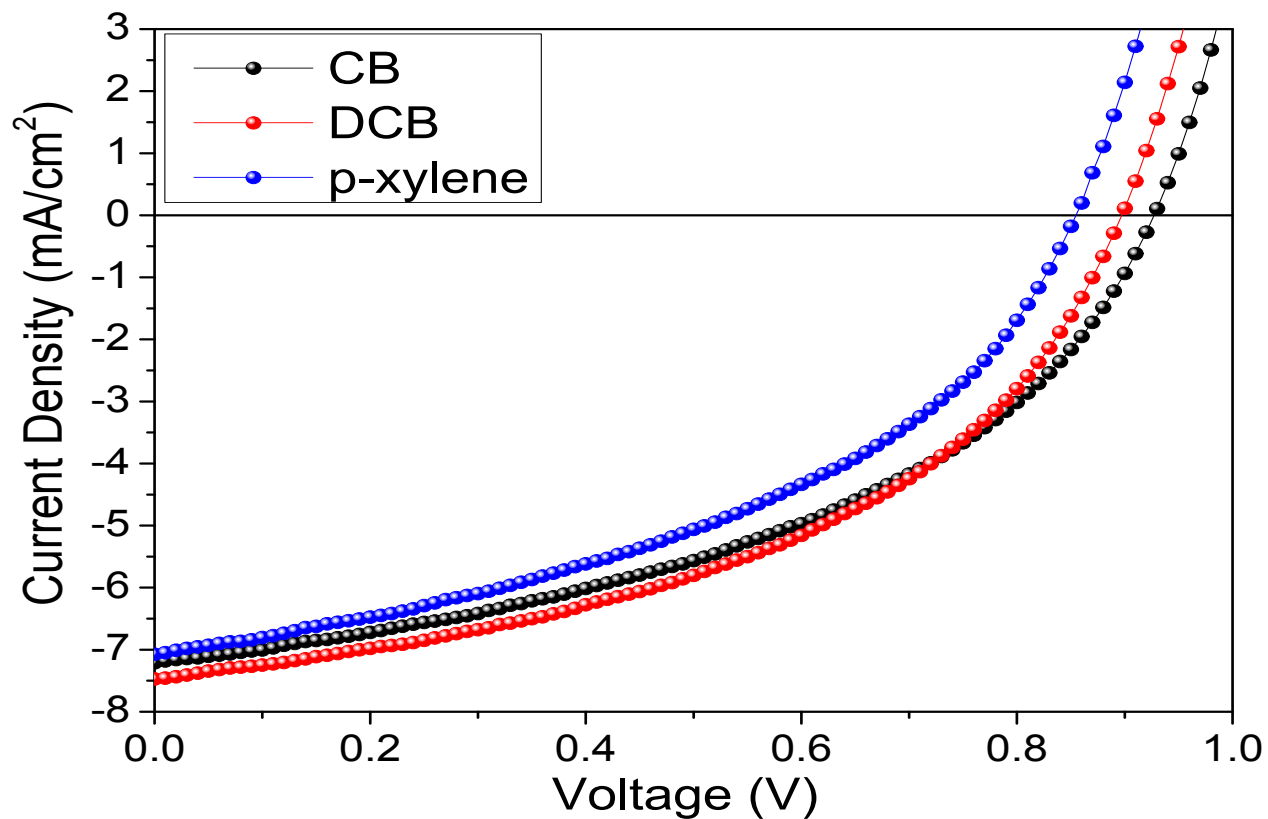

Figure 2 Current Density-Voltage characteristics of PBT-T1:PC<sub>60</sub>BM (1:2) solar cells processed with different solvents

|                 | $V_{oc}$<br>(V) | $J_{sc}$<br>(mA/cm <sup>2</sup> ) | Fill Factor | Efficiency<br>(%) |
|-----------------|-----------------|-----------------------------------|-------------|-------------------|
| <b>CB</b>       | 0.93            | 7.21                              | 0.45        | 2.99              |
| <b>DCB</b>      | 0.90            | 7.47                              | 0.46        | 3.09              |
| <b>p-xylene</b> | 0.85            | 7.07                              | 0.43        | 2.61              |

Table 1 Photovoltaic Parameters of PBT-T1:PC<sub>60</sub>BM Solar Cells (1:2) processed with different solvents

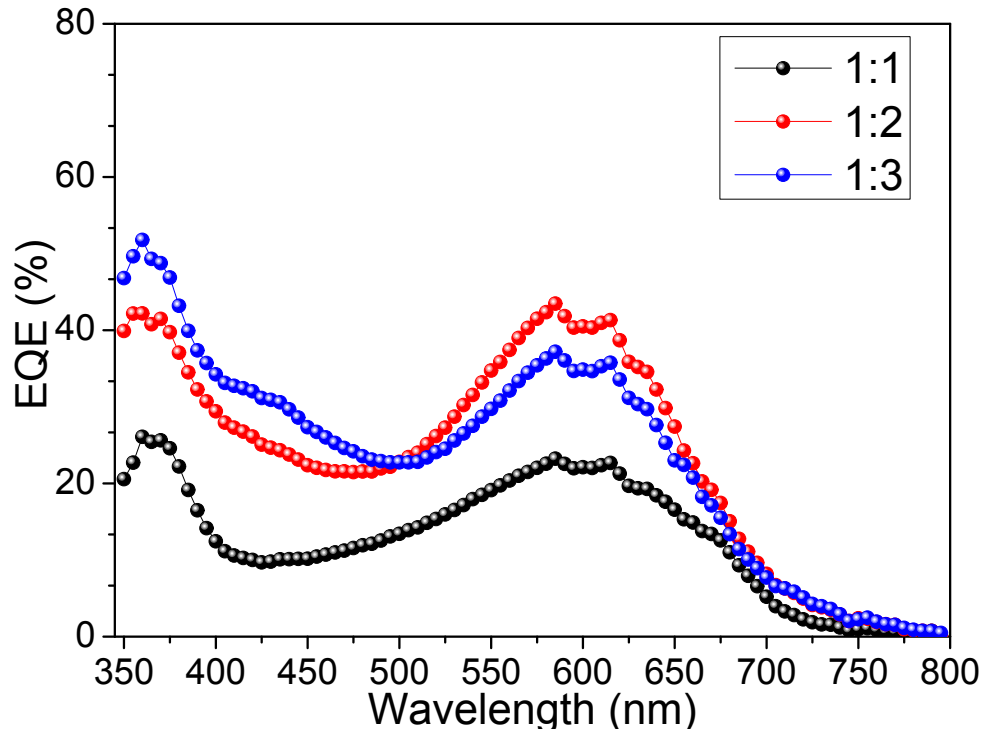

Figure 3 EQE of PBT-T1:PC60BM Solar Cells processed without additive
